# Supplementary material for: Mass transfer intensification and kinetics of o -xylene nitration in the microreactor
Source: publisher site journal article supplement (doi:10.1515/ijcre-2025-0082), 2025-09-01
Supplement: Supplementary file 1 [file j_ijcre-2025-0082_suppl_001.docx]

Supplementary Materials

**Mass transfer intensification and kinetics of *o*-xylene nitration in the microreactor[[1]](#footnote-1)**

Dong Liu, Na Fan, Shulong Li, Lu Ji, Shihao Liu, Tiehan Xing, Xiaodong Liu, Shuai Guo*

*Research Institute of Chemical Advanced Materials Shenyang Research Institute of Chemical Industry 8 East Shen Liao Road, Shenyang, 110021, P. R. of China*

1. Nitro products 1H NMR S1.

1H NMR (500 MHz, Chloroform-*d*) δ 8.05 (s, 1H), 8.00 (d, *J* = 5.8 Hz, 1H), 7.64 (d, *J* = 8.1 Hz, 2H), 7.41 (d, *J* = 7.4 Hz, 1H), 7.31 (d, *J* = 8.3 Hz, 1H), 7.25 (t, *J* = 7.8 Hz, 1H), 2.42 (d, *J* = 3.6 Hz, 6H), 2.41 (s, 6H).

1. Experimental setup diagram S2.


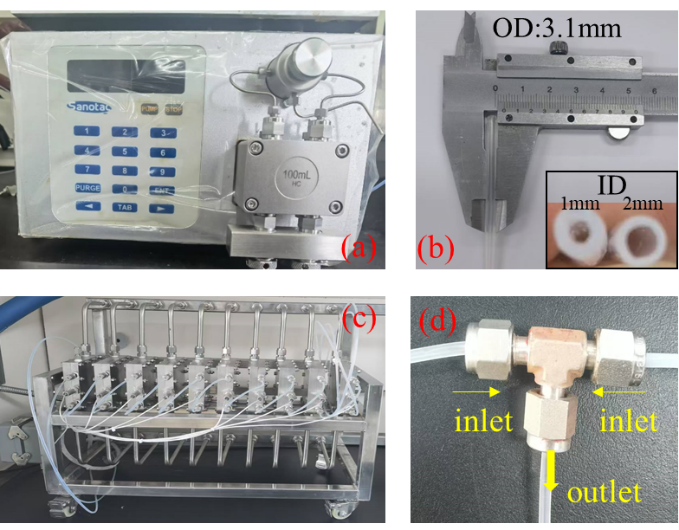


Figure 1 Experimental setup diagram. (a) metering pump (b) capillary tubes (c) microreactor (d) T-mixer

1. Table with the lengths of droplets and slugs of Figure 3 S3

Table1. The lengths of droplets and slugs of Figure 3

| Flow rate | QH2SO4 (mm) | Q*o*-xylene (mm) |
| --- | --- | --- |
| QH2SO4=3 mL; Q*o*-xylene=3 mL | 12 | 13 |
| QH2SO4=4 mL; Q*o*-xylene=4 mL | 9 | 11 |
| QH2SO4=5 mL; Q*o*-xylene=5 mL | 7 | 8 |
| QH2SO4=6 mL; Q*o*-xylene=6 mL | 5 | 6 |
| QH2SO4=7 mL; Q*o*-xylene=7 mL | 3 | 4 |
| QH2SO4=8 mL; Q*o*-xylene=8 mL | 13 | 2 |

1. * Corresponding author at College of Chemical Engineering, Nanjing University of Science and Technology, Nanjing 210094, China.

   *E-mail addresses*: guoshuai8@sinochem.com. [↑](#footnote-ref-1)
